# Supplementary material for: Synergistic redox enhancement: silver phosphate augmentation for optimizing magnesium copper phosphate in efficient energy storage devices and oxygen evolution reaction
Source: Royal Society of Chemistry journal article supplement (doi:10.1039/d3na00466j), 2023-01-01
Supplement: d3na00466j1.pdf [file d3na00466j1.pdf]

## **Synergistic Redox Enhancement: Silver Phosphate Augmentation for Optimizing Magnesium Copper Phosphate in Efficient Energy Storage Devices and Oxygen Evolution Reaction**

**Haseebul Hassan<sup>1</sup>, Muhammad Waqas Iqbal<sup>1\*</sup>, Nora Hamad Al-Shaalan<sup>2</sup>, Sarah Alharthi<sup>3</sup>, Nawal D. Alqarni<sup>4</sup>, Mohammed A. Amin<sup>3</sup>, Amir Muhammad Afzal<sup>1</sup>**

**<sup>1</sup>Department of Physics, Riphah International University, Campus Lahore, Pakistan**

**<sup>2</sup>Department of Chemistry, College of Science, Princess Nourah bint Abdulrahman University, P.O. Box 84428, Riyadh 11671, Saudi Arabia**

**<sup>3</sup>Department of Chemistry, College of Science, Taif University, P.O. Box 11099, Taif**

**<sup>4</sup>Department of Chemistry, College of Science, University of Bisha, Bisha, 61922, Saudi Arabia**

**E-mail: [waqas.iqbal@riphah.edu.pk](mailto:waqas.iqbal@riphah.edu.pk),**

### **Supplementary Section**

In the supplementary part, we also operate the three-cell assembly in 0 – 0.8 working potential. As can be seen from Figure S1, as the operating potential increases the area under the CV curves decreases. The shape of the CV curves becomes more straight. This means that at the higher potential, the redox reactions did not occur. The charge stored is mainly due to the absorption/desorption process. This may be due to the insufficient time required for redox reactions. More the GCD curves did not show discharging. Thus we can conclude that the best operating potential for these materials (MgCuPO<sub>4</sub>, S<sub>1</sub>, S<sub>2</sub>, and S<sub>3</sub>) is 0 – 0.6 V. More the charge

storage in supercapattery was also checked through Dunn's model and the results were explained in Figure S<sub>2</sub>.

$$i(v) = k_1v + k_2v^{0.5} \quad (1)$$

$$\frac{i(v)}{v^{0.5}} = k_1v^{0.5} + k_2 \quad (2)$$

The above equations were used to determine the storage mechanism.  $K_1$  indicates capacitive participation, and  $K_2$  determines diffusive participation. As can be seen from Figure S<sub>2</sub>, the capacitive contribution increases as the scan rate increases. At the first, the capacitive participation was 21% while diffusive participation was 79%. And as the scan rate increases to 50% the capacitive participation goes to 42%. This may be because, at the lower scan, the battery-graded electrode had enough time to complete the redox reactions. While at higher scan the battery-graded electrode had not enough time to complete the redox reactions. Table S1 represents the impedance of MgCuPO<sub>4</sub>, S<sub>1</sub>, S<sub>2</sub>, and S<sub>3</sub> in oxygen evolution reaction.

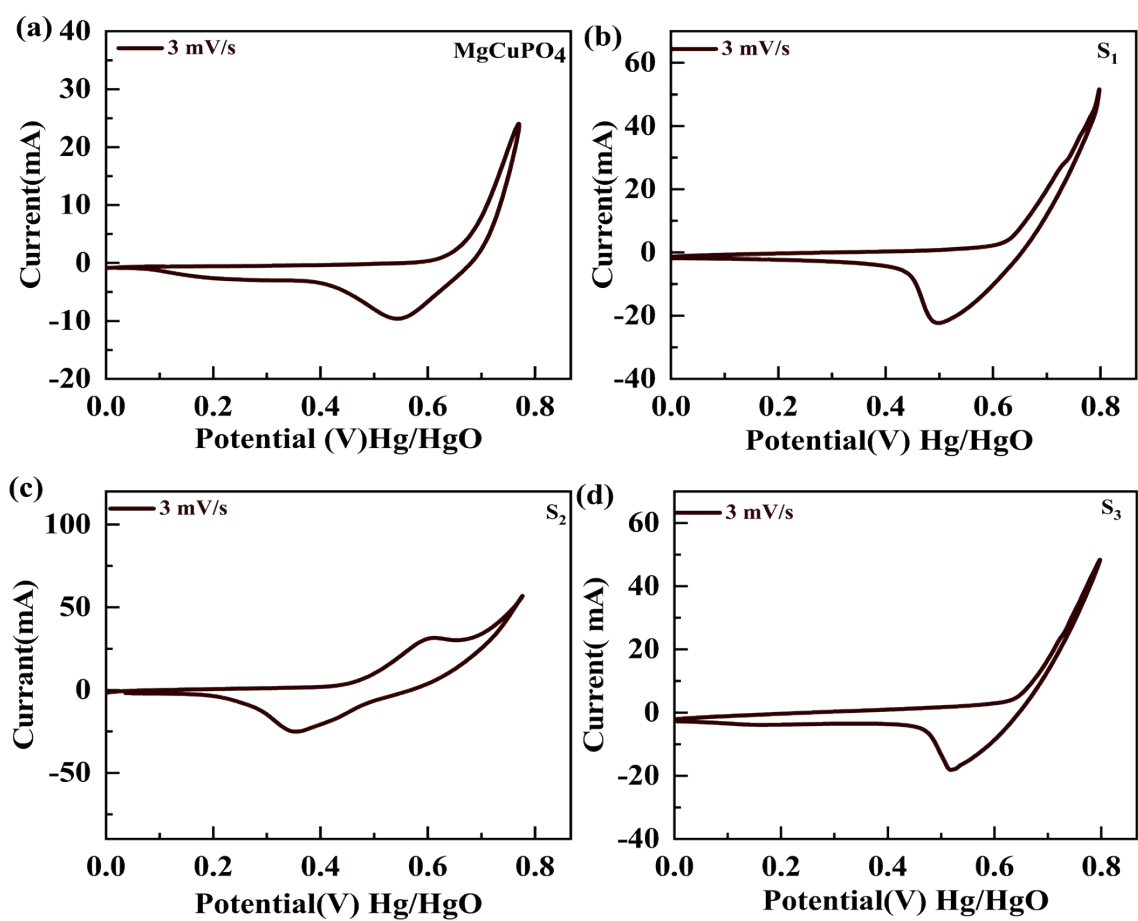

**Figure S1.** (a-d) Represents the CV curves for MgCuPO<sub>4</sub>, S<sub>1</sub>, S<sub>2</sub>, and S<sub>3</sub> at operating potential from 0 – 0.8 V.

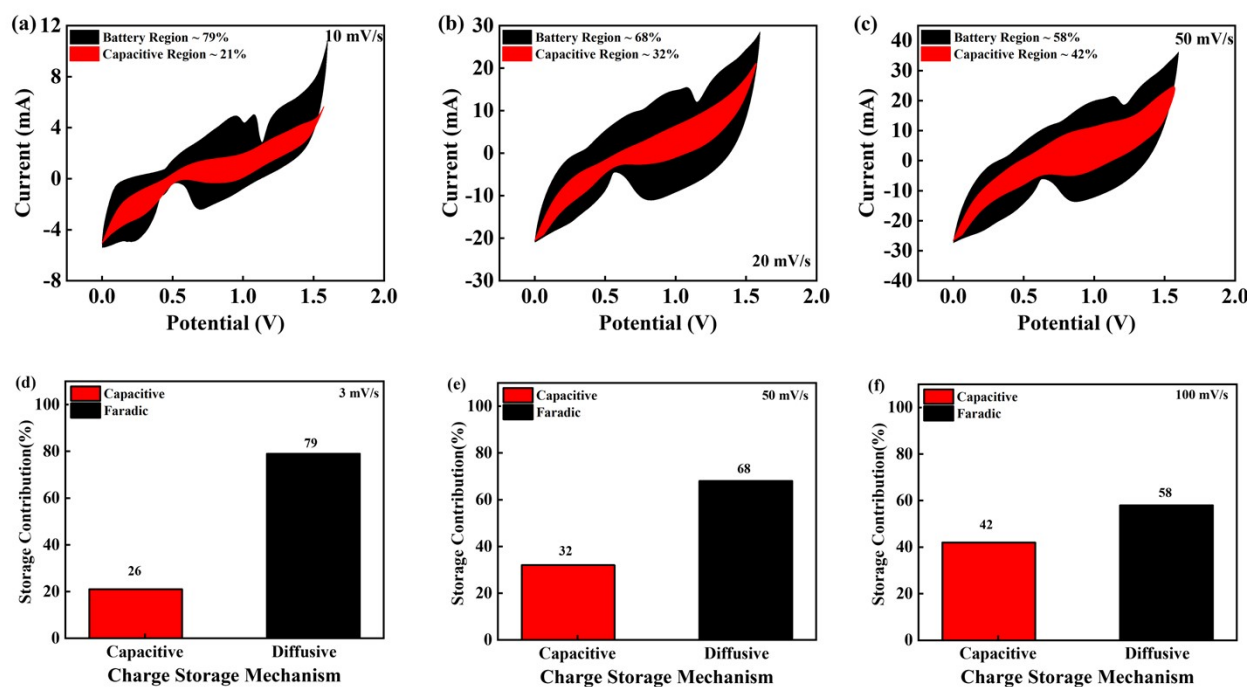

**Figure S2.** (a-c) Showed Dunn's model results at 10, 30, and 50 mV/s scan rate. (d-f) Bar chart showing the capacitive and diffusive participation.

| Materials           | Impedance ( $\Omega \text{ cm}^2$ ) |
|---------------------|-------------------------------------|
| MgCuPO <sub>4</sub> | 732                                 |
| S <sub>1</sub>      | 788                                 |
| S <sub>2</sub>      | 659                                 |
| S <sub>3</sub>      | 914                                 |

**Table S1.** Impedance measurements for MgCuPO<sub>4</sub>, S<sub>1</sub>, S<sub>2</sub>, and S<sub>3</sub> in oxygen evolution reaction.
